# Supplementary material for: Carbon, Nitrogen, and Phosphorus Allocation Strategy Among Organs in Submerged Macrophytes Is Altered by Eutrophication
Source: Front Plant Sci. 2020 Oct 19;11:524450. doi: 10.3389/fpls.2020.524450 (PMC7604295; doi:10.3389/fpls.2020.524450)
Supplement: Supplementary file 2 [file Table_2.XLSX]

## Sheet: Carbon,  nitrogen,  and phospho
WTN≤0.5, 0.5<WTN≤1, 1<WTN≤1.5, 1.5<WTN≤2 and WTN>2 mg L-1 for TN-1, TN-2, TN-3, TN-4 and TN-5, respectively (WTN indicate water TN concentrations)
leaf nitrogen content (mg g-1)	leaf carbon content (mg g-1)	leaf phosphorus content (mg g-1)	stem nitrogen content (mg g-1)	stem carbon content (mg g-1)	stem phosphorus content (mg g-1)	root nitrogen content (mg g-1)	root carbon content (mg g-1)	root phosphorus content (mg g-1)	growth forms	species	water TN levels
25.8324	427.426	4.10249	13.0751	380.182	4.78465	11.1811	373.019	2.16192	Erect	Potamogeton crispus	TN-1
25.8687	425.65	1.66871	NA	430.308	NA	20.7783	415.163	1.19	Canopy former	Potamogeton maackianus	TN-5
34.2779	426.383	NA	14.7293	390.719	1.26003	17.8713	394.586	1.51833	Erect	Potamogeton crispus	TN-2
34.3579	424.658	2.55904	13.3134	380.473	1.52967	13.9941	371.097	1.38647	Erect	Potamogeton crispus	TN-2
34.7821	436.616	2.64103	15.3154	395.487	1.58165	17.5784	363.442	1.70789	Erect	Potamogeton crispus	TN-2
39.1636	424.942	3.94153	20.1873	370.153	2.90786	21.5128	378.613	3.41065	Erect	Potamogeton crispus	TN-3
39.2022	418.609	2.80274	17.9957	375.209	1.7751	18.2923	370.941	2.04314	Erect	Potamogeton crispus	TN-2
39.4025	419.914	3.93212	18.8391	365.647	2.32694	21.6267	388.463	2.39691	Erect	Potamogeton crispus	TN-3
40.4757	430.197	4.20034	24.9711	390.123	3.58507	20.3892	378.791	2.276	Erect	Potamogeton crispus	TN-2
40.6182	427.571	3.79647	20.9888	385.716	2.66029	20.4833	342.181	2.36795	Erect	Potamogeton crispus	TN-2
40.8985	435.142	4.48965	15.6867	374.319	2.41886	18.5458	376.51	2.00976	Erect	Potamogeton crispus	TN-2
41.7938	421.294	4.4425	20.4369	355.823	2.86996	19.1511	371.474	2.30702	Erect	Potamogeton crispus	TN-3
42.2599	436.315	6.02144	23.8827	371.465	6.62606	21.0645	315.73	5.19009	Erect	Potamogeton crispus	TN-2
42.4421	421.919	4.2846	21.107	356.28	2.75368	24.2853	384.361	2.66412	Erect	Potamogeton crispus	TN-3
42.4972	424.04	4.14366	24.2111	372.795	3.49142	22.4702	369.903	2.92163	Erect	Potamogeton crispus	TN-3
42.6941	423.204	3.77734	24.5179	379.824	2.97267	16.5602	364.259	1.81805	Erect	Potamogeton crispus	TN-1
43.4361	428.464	4.40342	23.3292	360.064	3.46603	22.7964	382.024	3.29818	Erect	Potamogeton crispus	TN-3
43.6017	428.994	4.91771	22.5896	384.72	4.41268	23.1925	380.033	3.33402	Erect	Potamogeton crispus	TN-5
43.6399	434.863	5.80334	19.4764	369.136	4.12287	19.8632	339.855	5.45366	Erect	Potamogeton crispus	TN-3
43.8176	419.07	6.24439	25.1372	373.301	5.02486	20.6542	362.999	3.46418	Erect	Potamogeton crispus	TN-3
44.1947	425.513	4.69999	20.9569	378.125	3.13391	22.6227	385.893	2.15017	Erect	Potamogeton crispus	TN-2
44.2581	431.395	4.71737	20.8294	368.788	3.17172	20.2724	380.721	2.65057	Erect	Potamogeton crispus	TN-2
44.7661	418.836	5.17608	26.6836	392.562	5.4744	23.4455	377.865	3.53622	Erect	Potamogeton crispus	TN-3
44.8277	422.655	7.05666	25.1766	363.123	6.303	23.8873	357.524	NA	Erect	Potamogeton crispus	TN-2
44.8786	432.48	6.53296	26.2256	376.333	6.18533	23.52	328.843	NA	Erect	Potamogeton crispus	TN-4
45.1524	429.166	6.4305	20.6115	355.534	4.48201	21.1295	319.115	6.65877	Erect	Potamogeton crispus	TN-4
45.7236	430.465	5.67562	22.0303	372.841	3.12158	20.41	379.521	2.45757	Erect	Potamogeton crispus	TN-2
45.9652	427.949	5.55343	22.4292	366.783	4.35093	22.3565	361.141	3.847	Erect	Potamogeton crispus	TN-2
46.332	412.055	7.24844	25.1151	361.031	6.53856	21.0742	315.047	4.68221	Erect	Potamogeton crispus	TN-5
47.199	438.405	5.67112	22.7837	366.336	4.60747	20.8701	356.785	3.9905	Erect	Potamogeton crispus	TN-2
47.4009	435.874	6.32012	22.6476	390.665	5.16801	18.0138	367.826	2.69652	Erect	Potamogeton crispus	TN-5
47.9149	421.37	5.18086	22.5455	365.372	3.5798	24.3047	363.834	4.67196	Erect	Potamogeton crispus	TN-4
48.238	413.723	7.32044	26.428	359.612	6.60591	22.7155	345.903	8.7908	Erect	Potamogeton crispus	TN-3
48.9328	441.277	6.43179	24.1444	374.993	4.73394	23.4625	371.601	3.00384	Erect	Potamogeton crispus	TN-5
49.1397	431.248	6.04804	21.1652	350.354	3.34473	21.2464	326.83	7.19789	Erect	Potamogeton crispus	TN-5
49.3633	427.525	8.12534	28.5482	359.352	9.77743	20.8909	313.623	NA	Erect	Potamogeton crispus	TN-1
50.4858	427.675	7.76601	26.0563	358.273	7.2527	25.4529	350.618	8.80876	Erect	Potamogeton crispus	TN-2
50.7335	436.848	7.72728	28.6045	362.033	5.4104	19.2307	336.583	3.30397	Erect	Potamogeton crispus	TN-3
14.0188	410.639	3.35549	6.15099	402.722	2.91493	NA	NA	NA	Canopy former	Ceratophyllum demersum	TN-3
14.2514	445.383	1.0235	7.19459	442.858	0.817143	12.9119	428.618	1.11717	Canopy former	Myriophyllum spicatum	TN-4
14.9589	414.746	1.9095	7.33457	415.25	1.82185	NA	NA	NA	Canopy former	Ceratophyllum demersum	TN-3
15.1601	374.046	1.07254	4.91195	423.411	0.619517	10.8006	424.999	1.04852	Canopy former	Myriophyllum spicatum	TN-2
15.7647	392.086	1.01488	6.16706	427.752	0.647102	13.2684	416.314	1.30578	Canopy former	Myriophyllum spicatum	TN-2
16.6595	387.035	0.976362	6.44446	429.203	0.559346	11.5668	449.733	0.727262	Canopy former	Myriophyllum spicatum	TN-1
16.802	382.264	4.04424	11.4157	346.531	2.64557	12.8234	387.64	2.39434	Rosette	Vallisneria natans	TN-3
16.8265	387.041	2.55533	11.4913	393.971	2.93932	15.0351	373.462	3.0022	Rosette	Vallisneria natans	TN-3
17.6262	431.025	1.32755	7.61234	423.826	1.0146	11.0837	438.792	0.74642	Canopy former	Myriophyllum spicatum	TN-5
17.7082	413.032	1.46374	10.0178	436.92	1.31299	14.6011	431.989	1.12681	Canopy former	Myriophyllum spicatum	TN-2
18.5598	450.087	2.37894	5.63922	406.175	1.80349	8.28053	430.815	1.38761	Canopy former	Myriophyllum spicatum	TN-3
19.1659	404.471	3.04752	10.4939	394.447	2.24973	18.4364	364.745	1.66123	Erect	Hydrilla verticillata	TN-3
19.3917	364.436	2.23856	15.3214	322.25	1.40353	17.9977	334.289	1.59842	Rosette	Vallisneria natans	TN-4
19.6189	397.511	3.97232	11.8805	371.596	2.02834	13.531	389.567	1.94548	Rosette	Vallisneria natans	TN-3
20.0241	451.015	2.57254	5.69454	415.619	2.04791	10.4838	424.149	2.4738	Canopy former	Myriophyllum spicatum	TN-3
20.0583	360.905	1.7625	25.8069	357.13	3.61736	17.4219	313.199	3.96613	Rosette	Vallisneria natans	TN-3
20.1223	424.795	1.57582	9.1932	423.594	0.890788	14.3136	416.598	1.23533	Canopy former	Potamogeton wrightii	TN-1
20.1705	408.324	1.97605	8.42273	387.51	1.68382	NA	NA	NA	Canopy former	Ceratophyllum demersum	TN-3
20.1964	416.736	1.43165	10.3526	423.442	0.979252	12.0472	416.277	1.23225	Canopy former	Potamogeton wrightii	TN-2
20.5729	428.138	1.73071	11.5115	420.347	1.0786	6.00318	410.875	0.993673	Canopy former	Potamogeton wrightii	TN-5
20.6741	425.626	1.93542	10.0462	427.736	1.38135	11.0028	400.806	1.47598	Canopy former	Potamogeton wrightii	TN-1
20.7045	395.821	1.61852	7.46586	417.715	0.823816	16.7312	431.745	1.13992	Canopy former	Myriophyllum spicatum	TN-1
21.0322	454.176	2.06829	5.87802	409.776	1.49356	10.2802	431.667	1.15122	Canopy former	Myriophyllum spicatum	TN-3
21.4222	395.484	2.67127	10.0643	331.157	1.19649	13.7365	384.746	1.38847	Rosette	Vallisneria natans	TN-3
21.6668	356.745	2.14385	8.91331	249.446	0.889057	15.0541	328.628	1.17763	Rosette	Vallisneria natans	TN-5
22.1233	451.103	1.93924	7.08528	409.669	0.74776	11.2326	440.957	0.824571	Canopy former	Myriophyllum spicatum	TN-3
22.3437	457.057	1.9342	8.53708	408.493	1.24423	12.1138	427.897	0.989829	Canopy former	Myriophyllum spicatum	TN-3
22.4909	380.947	2.13291	13.0024	387.343	1.73007	22.7728	376.397	2.69761	Erect	Hydrilla verticillata	TN-5
22.557	413.534	1.86376	15.2787	411.12	1.52091	NA	NA	NA	Canopy former	Ceratophyllum demersum	TN-1
22.9753	411.073	2.26721	12.4141	402.047	1.28254	NA	NA	NA	Canopy former	Ceratophyllum demersum	TN-3
23.1814	434.717	1.61017	8.50503	421.081	0.929814	9.3309	412.888	1.089	Canopy former	Potamogeton wrightii	TN-1
23.2672	445.847	1.43329	15.0675	432.809	1.13787	19.5506	418.916	1.28446	Canopy former	Potamogeton maackianus	TN-5
23.4235	417.082	3.50881	10.2452	394.385	3.09904	NA	NA	NA	Canopy former	Ceratophyllum demersum	TN-3
23.4407	449.256	1.54376	9.37543	434.663	0.81052	11.6891	426.681	0.737083	Canopy former	Myriophyllum spicatum	TN-5
23.6775	381.596	3.90382	14.4613	344.503	2.46762	18.1207	368.214	2.53273	Rosette	Vallisneria natans	TN-3
23.7963	361.334	3.05658	13.4955	332.948	1.53437	17.6922	375.35	1.89685	Rosette	Vallisneria natans	TN-4
23.828	407.97	2.24012	14.9347	403.307	1.74035	NA	NA	NA	Canopy former	Ceratophyllum demersum	TN-2
23.8623	446.477	2.23711	5.7023	402.351	1.08461	11.7546	421.509	1.40102	Canopy former	Myriophyllum spicatum	TN-3
23.9157	425.709	1.44112	20.8449	430.378	1.45101	19.6479	408.312	1.24576	Canopy former	Potamogeton maackianus	TN-5
24.0293	332.607	1.7503	18.8036	383.639	2.04426	NA	NA	NA	Erect	Hydrilla verticillata	TN-1
24.0872	402.88	3.80882	16.1677	384.009	3.00941	14.3236	370.701	1.89013	Erect	Hydrilla verticillata	TN-4
24.1898	381.974	5.99622	13.1682	354.28	3.56996	14.3855	383.568	3.41399	Rosette	Vallisneria natans	TN-3
24.3113	419.822	3.926	10.6416	393.45	4.22984	NA	NA	NA	Canopy former	Ceratophyllum demersum	TN-3
24.5332	327.803	2.28658	17.0637	272.732	2.53142	19.4646	290.606	2.28587	Rosette	Vallisneria natans	TN-4
24.5766	383.378	3.89953	16.9687	353.759	2.78888	18.526	378.377	2.7062	Rosette	Vallisneria natans	TN-3
24.7041	426.12	1.23136	14.8207	442.636	0.965756	20.6621	423.323	NA	Canopy former	Potamogeton maackianus	TN-2
24.8477	435.336	1.29023	14.9059	449.739	1.04938	20.8088	424.047	NA	Canopy former	Potamogeton maackianus	TN-1
24.8788	383.641	2.39008	16.8029	386.95	2.08117	20.3478	378.923	2.38564	Erect	Hydrilla verticillata	TN-5
25.1178	380.827	2.20972	22.8171	384.69	2.1108	NA	NA	NA	Canopy former	Ceratophyllum demersum	TN-4
25.1835	412.3	3.75806	11.7257	382.924	6.61618	NA	NA	NA	Canopy former	Ceratophyllum demersum	TN-3
25.2807	384.807	2.33022	17.8324	349.958	1.312	17.9896	378.569	1.44171	Rosette	Vallisneria natans	TN-3
25.3538	419.593	2.24595	14.2795	414.829	1.58032	NA	NA	NA	Canopy former	Ceratophyllum demersum	TN-1
25.5148	418.33	1.75947	16.7912	413.185	1.44479	22.8924	418.212	1.52047	Canopy former	Potamogeton maackianus	TN-5
25.6415	423.467	2.04617	12.4189	412.262	1.09275	7.73844	412.808	1.05052	Canopy former	Potamogeton wrightii	TN-5
25.7121	411.591	1.75228	18.8378	423.478	1.47073	20.7296	412.674	1.06884	Canopy former	Potamogeton maackianus	TN-5
25.747	424.548	2.15094	14.2181	436.785	1.40656	18.7499	417.902	1.22515	Canopy former	Potamogeton maackianus	TN-1
26.1134	442.647	1.35411	18.2833	435.26	1.10328	23.4298	418.475	1.35928	Canopy former	Potamogeton maackianus	TN-5
26.1624	364.825	2.13983	23.5732	406.989	2.20099	21.3708	416.21	1.29912	Canopy former	Potamogeton maackianus	TN-5
26.4501	444.245	1.35192	18.5073	438.046	1.08962	20.9891	416.083	1.18938	Canopy former	Potamogeton maackianus	TN-4
26.5335	399.484	2.56842	16.2806	386.39	2.38168	NA	NA	NA	Canopy former	Ceratophyllum demersum	TN-3
26.5563	381.357	2.92365	20.5269	401.745	2.1377	21.574	380.103	1.77463	Rosette	Vallisneria natans	TN-2
26.6841	406.87	1.72902	20.609	413.478	1.3323	22.5153	415.781	1.12222	Canopy former	Potamogeton maackianus	TN-5
26.6956	357.262	3.07683	21.8261	379.437	3.28631	19.9559	264.427	4.06728	Rosette	Vallisneria natans	TN-2
26.9364	415.378	1.77922	20.3495	415.393	1.38107	19.5633	420.55	1.069	Canopy former	Potamogeton maackianus	TN-5
26.9441	405.945	1.90917	16.2399	423.037	1.11294	20.8186	419.158	1.31455	Canopy former	Potamogeton maackianus	TN-5
26.9668	378.635	2.55179	18.4295	385.43	2.02566	22.4803	374.2	2.23897	Erect	Hydrilla verticillata	TN-5
27.0897	402.669	4.10257	15.4443	387.596	4.29401	NA	NA	NA	Canopy former	Ceratophyllum demersum	TN-3
27.097	444.713	2.26023	9.56145	395.215	1.27417	12.0309	423.136	1.2187	Canopy former	Myriophyllum spicatum	TN-3
27.5084	417.472	1.67869	20.1315	415.961	1.33126	23.4299	413.495	1.28024	Canopy former	Potamogeton maackianus	TN-5
27.5507	434.541	1.44051	18.075	426.736	1.07303	21.6732	422.665	1.22076	Canopy former	Potamogeton maackianus	TN-5
27.7044	379.409	6.57157	23.4333	348.687	4.44378	20.0638	393.066	4.62181	Rosette	Vallisneria natans	TN-3
28.0666	432.411	1.6705	19.4695	436.135	1.50733	24.8478	423.075	1.03161	Canopy former	Potamogeton maackianus	TN-1
28.1248	447.42	1.41304	14.8198	434.985	1.03083	20.7202	432.343	NA	Canopy former	Potamogeton maackianus	TN-1
28.2108	429.254	1.87776	14.0364	439.795	1.09219	21.1576	412.743	1.07002	Canopy former	Potamogeton maackianus	TN-2
28.212	419.498	2.30497	16.2525	440.431	2.00103	17.4864	403.896	1.83273	Canopy former	Potamogeton maackianus	TN-1
28.3206	352.194	2.29778	19.6285	352.614	3.13256	19.9737	359.747	3.0895	Rosette	Vallisneria natans	TN-3
28.5267	431.995	1.39097	19.9779	429.109	1.22642	20.2481	421.98	1.01766	Canopy former	Potamogeton maackianus	TN-5
28.638	421.906	1.51578	17.2335	433.361	1.09752	19.7369	425.54	1.08149	Canopy former	Potamogeton maackianus	TN-1
28.7857	423.962	1.88849	17.1534	433.168	1.42306	22.4959	401.896	1.01856	Canopy former	Potamogeton maackianus	TN-2
28.8718	427.17	1.69973	14.1012	434.893	1.08941	22.9978	408.941	1.15404	Canopy former	Potamogeton maackianus	TN-2
28.9851	351.518	2.29493	26.7307	313.199	1.96666	19.709	293.795	1.78921	Rosette	Vallisneria natans	TN-4
29.2569	349.704	2.40077	17.627	296.735	1.92135	22.2136	323.109	2.01783	Rosette	Vallisneria natans	TN-4
29.5845	426.122	2.34139	20.2084	419.603	1.68804	19.9655	414.695	1.27411	Canopy former	Potamogeton maackianus	TN-5
29.6683	388.101	3.121	19.2555	348.859	1.62148	19.5499	392.068	1.84129	Rosette	Vallisneria natans	TN-3
29.8203	423.277	2.09106	19.5477	403.03	1.52411	21.1826	415.026	1.41175	Canopy former	Potamogeton maackianus	TN-5
29.9018	446.646	3.42136	7.57821	402.811	1.93955	13.5433	410.889	2.45793	Canopy former	Myriophyllum spicatum	TN-3
29.9573	428.168	2.10299	16.5424	432.824	1.74885	20.2526	410.734	1.51039	Canopy former	Potamogeton maackianus	TN-1
30.4488	441.756	2.32468	20.0764	437.641	1.83525	24.4512	432.569	1.29311	Canopy former	Potamogeton maackianus	TN-2
30.581	396.871	2.53415	17.9295	391.196	1.86481	NA	NA	NA	Canopy former	Ceratophyllum demersum	TN-1
31.1916	427.674	2.23915	22.7038	439.15	1.90542	25.9209	421.742	1.4587	Canopy former	Potamogeton maackianus	TN-2
31.2624	348.129	3.89682	18.7692	354.149	4.79575	22.8385	360.694	4.911	Rosette	Vallisneria natans	TN-3
31.5576	432.148	2.286	20.319	413.979	1.60398	24.1997	422.277	1.46629	Canopy former	Potamogeton maackianus	TN-5
31.7203	359.384	3.85045	17.5738	357.813	5.26028	17.4624	318.09	5.73526	Rosette	Vallisneria natans	TN-3
31.7878	387.206	3.01045	18.7808	394.536	2.96227	13.1189	407.095	3.51495	Canopy former	Potamogeton wrightii	TN-3
32.5215	430.77	2.53108	18.1783	404.775	1.71238	14.999	382.177	2.86268	Canopy former	Potamogeton wrightii	TN-3
32.5759	399.218	1.8893	16.2869	404.434	0.991973	13.9069	433.474	0.73116	Canopy former	Myriophyllum spicatum	TN-4
32.7297	454.171	2.53172	15.7893	437.56	1.66589	18.9227	404.454	1.28452	Canopy former	Potamogeton maackianus	TN-2
32.7313	370.689	3.59863	22.2923	333.515	2.57513	18.1278	343.591	2.24662	Rosette	Vallisneria natans	TN-4
33.0697	388.107	2.41805	21.2947	367.576	2.22512	18.3866	369.117	1.83306	Rosette	Vallisneria natans	TN-3
33.9614	364.463	3.71183	25.2622	345.601	2.68024	24.4626	348.88	2.93593	Erect	Hydrilla verticillata	TN-4
34.1081	407.179	2.65834	20.3601	384.527	1.84196	NA	NA	NA	Canopy former	Ceratophyllum demersum	TN-4
34.127	448.939	1.90106	22.584	444.834	1.14501	20.9531	426.561	1.03976	Canopy former	Potamogeton maackianus	TN-4
34.2305	417.933	2.60904	16.9345	396.618	1.10111	12.2874	395.097	1.25054	Canopy former	Potamogeton wrightii	TN-4
35.074	398.02	4.2298	18.8084	362.397	1.79449	NA	NA	NA	Canopy former	Ceratophyllum demersum	TN-3
35.9923	460.849	2.75344	19.6854	436.577	2.05412	22.9533	404.792	1.07547	Canopy former	Potamogeton maackianus	TN-2
39.3015	402.945	3.75401	20.9058	394.384	3.15239	19.5036	388.168	3.4648	Canopy former	Myriophyllum spicatum	TN-2
41.1797	404.381	5.47652	22.166	380.621	4.12598	20.9799	411.058	2.24746	Canopy former	Myriophyllum spicatum	TN-2
42.0628	411.931	7.91521	27.0968	380.351	4.13789	NA	NA	NA	Canopy former	Ceratophyllum demersum	TN-3
43.0199	407.438	9.07685	30.0328	379.867	6.52738	NA	NA	NA	Canopy former	Ceratophyllum demersum	TN-3
50.7349	442.715	6.30116	NA	392.585	5.12234	20.1708	378.617	2.72357	Erect	Potamogeton crispus	TN-5
17.8615	446.17	1.32703	5.96872	428.834	0.911744	7.90651	430.984	0.819338	Canopy former	Myriophyllum spicatum	TN-4
18.7451	404.628	1.47905	7.29262	419.356	0.82232	17.7457	405.062	1.45935	Canopy former	Myriophyllum spicatum	TN-2
20.7035	409.909	3.57508	11.0753	396.86	4.39787	NA	NA	NA	Canopy former	Ceratophyllum demersum	TN-3
21.2381	429.023	1.7775	9.05476	409.842	1.39883	7.82349	396.845	1.49501	Canopy former	Potamogeton wrightii	TN-3
21.3529	359.128	2.32514	14.9017	271.945	1.65341	16.7879	350.426	1.73161	Rosette	Vallisneria natans	TN-5
22.0024	432.178	1.77674	7.23253	423.507	0.89645	13.3531	438.037	1.18349	Canopy former	Myriophyllum spicatum	TN-2
23.4449	402.218	2.75617	13.2649	382.494	1.97709	18.376	356.396	3.45667	Erect	Hydrilla verticillata	TN-3
23.6939	451.451	1.66064	10.6702	418.281	1.02446	10.2204	421.809	0.782818	Canopy former	Myriophyllum spicatum	TN-4
23.7465	427.102	2.51403	14.2149	412.836	1.69755	12.2221	381.959	3.95514	Canopy former	Potamogeton wrightii	TN-3
24.0634	369.941	3.72259	16.2473	359.916	3.47959	16.8844	371.982	3.11711	Rosette	Vallisneria natans	TN-4
24.0696	416.661	2.27567	9.4	425.098	1.58109	11.2661	414.23	1.44841	Canopy former	Myriophyllum spicatum	TN-2
24.7116	438.589	2.3081	9.57542	415.004	1.19845	7.1568	396.219	0.830497	Canopy former	Potamogeton wrightii	TN-5
24.9785	438.697	2.42416	6.17012	413.175	1.05498	9.8475	426.563	1.23753	Canopy former	Myriophyllum spicatum	TN-3
25.1731	424.708	1.35722	19.5802	441.441	NA	22.5891	419.116	0.502569	Canopy former	Potamogeton maackianus	TN-2
25.1816	385.861	3.70563	20.3722	364.913	3.20272	19.778	387.802	2.98207	Rosette	Vallisneria natans	TN-3
25.1826	368.489	1.81039	19.0468	380.359	1.904	21.9986	355.756	1.96567	Rosette	Vallisneria natans	TN-1
26.2697	423.992	2.56986	14.0081	423.126	2.01394	NA	NA	NA	Canopy former	Potamogeton wrightii	TN-1
26.4009	407.689	2.47175	11.1246	387.665	1.67912	NA	NA	NA	Canopy former	Ceratophyllum demersum	TN-4
26.6729	360.123	3.53293	22.2401	348.28	2.98516	19.5982	289.54	2.5698	Rosette	Vallisneria natans	TN-2
26.6855	374.638	2.41547	14.9256	414.038	2.28891	14.5094	433.032	1.83536	Canopy former	Myriophyllum spicatum	TN-2
26.7155	441.933	4.09858	9.03853	405.407	4.54983	13.161	410.818	5.59612	Canopy former	Myriophyllum spicatum	TN-3
27.0047	423.097	2.14995	11.5738	392.673	1.27386	16.9055	415.221	2.01839	Canopy former	Myriophyllum spicatum	TN-2
27.0981	388.219	5.73708	12.6319	347.389	5.8836	15.6764	361.335	6.07046	Rosette	Vallisneria natans	TN-3
27.3451	370.421	2.5587	14.8798	359.621	1.76549	20.5571	363.303	2.17492	Erect	Hydrilla verticillata	TN-1
27.3487	354.312	2.52632	20.7004	382.286	2.19592	23.8031	326.27	2.58029	Rosette	Vallisneria natans	TN-2
27.3528	374.756	3.56949	32.0436	373.957	4.61318	23.0315	366.99	2.61641	Rosette	Vallisneria natans	TN-1
27.3639	416.933	3.11441	15.3454	395.206	3.28011	NA	NA	NA	Canopy former	Ceratophyllum demersum	TN-3
27.376	379.59	1.49564	14.9251	414.62	0.836563	17.3674	440.855	0.802606	Canopy former	Myriophyllum spicatum	TN-4
28.2581	424.855	2.95096	13.6437	427.364	1.79422	NA	NA	NA	Canopy former	Potamogeton wrightii	TN-2
28.4906	418.804	1.89002	13.4904	423.306	1.05624	19.7077	392.735	1.24709	Canopy former	Potamogeton wrightii	TN-1
28.8447	376.916	2.72605	13.277	403.358	1.99955	16.6213	420.523	2.2262	Canopy former	Myriophyllum spicatum	TN-3
28.9834	425.924	2.81509	12.0362	400.969	1.63148	NA	NA	NA	Canopy former	Ceratophyllum demersum	TN-4
29.2008	372.846	3.30358	11.9188	269.04	3.94091	15.0916	279.025	3.06563	Rosette	Vallisneria natans	TN-3
29.3733	370.927	1.75097	16.3838	386.044	1.68576	21.1139	373.239	1.66723	Rosette	Vallisneria natans	TN-3
29.4501	397.08	2.77921	18.991	390.047	1.98465	NA	NA	NA	Canopy former	Ceratophyllum demersum	TN-4
29.5994	363.032	3.3869	20.8674	407.839	1.6621	21.7479	274.188	3.76635	Rosette	Vallisneria natans	TN-2
29.6722	410.577	2.10847	22.4708	405.462	1.62111	NA	NA	NA	Canopy former	Ceratophyllum demersum	TN-1
29.7218	377.257	3.54376	24.9997	361.551	3.05947	26.408	359.292	3.98579	Rosette	Vallisneria natans	TN-2
29.881	369.998	2.21905	18.912	357.637	1.78381	23.9965	371.931	2.37801	Erect	Hydrilla verticillata	TN-1
29.8983	381.087	4.16358	22.4068	364.041	3.08215	22.1343	293.933	4.51826	Rosette	Vallisneria natans	TN-2
29.9145	369.054	3.95826	17.5985	361.105	4.02755	19.3689	331.853	5.209	Rosette	Vallisneria natans	TN-3
30.4279	408.12	2.54293	18.4644	393.291	1.74599	NA	NA	NA	Canopy former	Ceratophyllum demersum	TN-2
30.6894	351.8	3.9435	19.0721	358.589	5.3298	18.6334	372.035	4.86298	Rosette	Vallisneria natans	TN-4
30.8411	445.44	1.60468	20.0843	431.093	1.17034	23.6096	420.623	1.14285	Canopy former	Potamogeton maackianus	TN-1
30.8986	388.69	3.15014	16.3702	359.685	2.16943	21.3735	363.322	2.62494	Erect	Hydrilla verticillata	TN-2
30.8995	429.93	1.6945	19.6682	436.57	1.07276	20.6377	426.012	1.06495	Canopy former	Potamogeton maackianus	TN-1
31.1431	373.154	4.00403	19.4161	339.729	5.86808	22.7966	323.761	NA	Rosette	Vallisneria natans	TN-2
31.1513	363.566	5.00369	28.2534	357.525	6.06382	25.9776	293.403	9.08088	Rosette	Vallisneria natans	TN-2
31.4051	361.756	5.68214	24.0563	351.409	8.46169	22.4927	271.443	NA	Rosette	Vallisneria natans	TN-2
31.4173	346.37	5.15668	28.9799	345.164	9.64619	22.7454	NA	14.9457	Rosette	Vallisneria natans	TN-5
31.7287	388.914	4.21383	17.5686	400.572	2.90076	10.8201	400.766	4.35656	Canopy former	Potamogeton wrightii	TN-4
32.1966	418.555	2.59645	21.6568	397.492	1.64679	NA	NA	NA	Canopy former	Ceratophyllum demersum	TN-2
32.2502	361.776	5.24222	26.9833	348.136	7.66119	20.1626	228.767	NA	Rosette	Vallisneria natans	TN-2
32.3507	369.183	3.25469	24.8915	369.892	3.31744	20.8585	269.197	2.44096	Rosette	Vallisneria natans	TN-2
32.3609	341.538	8.75661	23.223	372.534	8.06332	18.3375	NA	14.3794	Rosette	Vallisneria natans	TN-5
32.4793	432.709	2.77381	21.6264	432.223	1.50922	NA	NA	NA	Canopy former	Potamogeton maackianus	TN-4
32.604	336.95	3.28498	18.7973	361.71	3.61279	18.6068	325.295	5.23878	Rosette	Vallisneria natans	TN-4
32.8849	369.574	4.16622	19.6586	341.937	3.53021	21.5952	347.439	3.18805	Erect	Hydrilla verticillata	TN-2
33.075	356.352	5.00356	20.6365	288.912	11.3937	17.9369	200.682	13.9229	Rosette	Vallisneria natans	TN-3
33.1956	375.479	NA	24.7718	376.644	7.06985	26.1671	307.231	NA	Rosette	Vallisneria natans	TN-2
33.3541	408.228	2.06576	23.6425	410.07	1.41803	NA	NA	NA	Canopy former	Ceratophyllum demersum	TN-1
33.3648	447.629	2.17969	20.3178	434.576	1.91467	23.9913	409.566	1.23965	Canopy former	Potamogeton maackianus	TN-1
33.4384	446.154	3.90372	16.3609	417.021	2.7626	14.6122	393.702	3.8606	Canopy former	Potamogeton wrightii	TN-2
33.4705	431.504	3.23548	17.8475	409.44	2.63405	13.335	400.717	3.19147	Canopy former	Potamogeton wrightii	TN-2
33.6863	363.541	4.3603	19.1352	353.833	3.85755	23.2273	366.928	3.78801	Erect	Hydrilla verticillata	TN-3
33.7931	381.529	3.53428	NA	NA	NA	NA	NA	NA	Rosette	Vallisneria natans	TN-2
34.3028	416.836	4.25709	17.899	396.809	3.2652	15.8565	370.035	6.34093	Canopy former	Potamogeton wrightii	TN-2
34.9953	425.015	5.24205	18.5769	413.546	3.12928	16.1759	389.764	5.69093	Canopy former	Potamogeton wrightii	TN-3
35.2594	401.907	3.59461	19.4121	359.321	2.77863	23.812	362.421	2.95106	Erect	Hydrilla verticillata	TN-2
35.3687	373.071	6.61747	21.3695	353.868	5.05181	15.95	347.458	3.40505	Erect	Hydrilla verticillata	TN-4
35.6585	439.714	2.34317	25.9459	431.679	1.72805	25.9546	419.421	1.26645	Canopy former	Potamogeton maackianus	TN-1
36.1891	371.424	6.91658	27.9721	355.401	NA	18.2455	214.411	26.3782	Rosette	Vallisneria natans	TN-2
36.2316	422.111	5.09924	17.1527	406.209	3.97259	11.3824	393.97	5.0797	Canopy former	Potamogeton wrightii	TN-4
36.5865	416.168	3.56108	19.1118	372.805	1.75341	NA	NA	NA	Canopy former	Ceratophyllum demersum	TN-4
36.7436	409.093	5.15294	22.1024	377.095	3.36496	NA	NA	NA	Canopy former	Ceratophyllum demersum	TN-4
36.7438	378.583	4.61347	22.6711	348.997	4.10687	23.2507	338.901	3.70015	Erect	Hydrilla verticillata	TN-2
37.0038	415.169	3.60421	27.8132	412.781	4.42596	24.6548	392.886	2.61545	Canopy former	Potamogeton maackianus	TN-3
37.656	414.267	5.2018	24.4321	381.847	3.13694	NA	NA	NA	Canopy former	Ceratophyllum demersum	TN-2
37.8621	381.725	4.60234	21.4578	338.178	3.80932	24.739	357.125	3.73475	Erect	Hydrilla verticillata	TN-2
38.5978	406.414	4.67817	22.7246	380.282	3.45181	NA	NA	NA	Canopy former	Ceratophyllum demersum	TN-2
39.1752	385.374	4.04179	20.9874	340.631	4.01954	23.9254	352.531	4.65941	Erect	Hydrilla verticillata	TN-2
41.8563	407.54	9.31058	25.0083	368.067	5.8697	NA	NA	NA	Canopy former	Ceratophyllum demersum	TN-5
41.8651	387.278	6.52638	22.2211	327.89	6.62002	23.7329	350.561	4.25537	Erect	Hydrilla verticillata	TN-2
42.3858	414.234	7.53719	26.4713	382.062	4.04752	NA	NA	NA	Canopy former	Ceratophyllum demersum	TN-2
42.7754	393.545	8.49931	24.6569	372.989	4.55418	NA	NA	NA	Canopy former	Ceratophyllum demersum	TN-2
42.8695	403.225	7.73096	13.4565	395.57	3.63768	NA	NA	NA	Canopy former	Ceratophyllum demersum	TN-3
42.8835	403.677	4.59034	26.5139	357.825	6.96395	NA	NA	NA	Erect	Hydrilla verticillata	TN-2
42.9919	416.24	6.19287	22.069	376.79	2.37497	NA	NA	NA	Canopy former	Ceratophyllum demersum	TN-4
43.0395	399.841	9.05401	27.9904	366.889	6.24702	NA	NA	NA	Canopy former	Ceratophyllum demersum	TN-4
43.2606	405.993	10.1402	29.4391	380.826	6.83064	NA	NA	NA	Canopy former	Ceratophyllum demersum	TN-5
43.2871	408.295	10.2817	28.3692	383.345	7.74377	NA	NA	NA	Canopy former	Ceratophyllum demersum	TN-5
45.3855	409.102	4.4292	17.1977	401.525	1.7417	20.1492	409.915	2.26382	Canopy former	Myriophyllum spicatum	TN-3
45.6071	445.795	4.23321	25.3871	385.306	2.64329	NA	NA	NA	Canopy former	Ceratophyllum demersum	TN-3
45.6664	430.622	8.7229	34.0022	388.685	5.79261	NA	NA	NA	Canopy former	Ceratophyllum demersum	TN-3
19.8776	397.128	1.92684	11.3812	389.55	1.49553	21.7229	374.86	2.80899	Erect	Hydrilla verticillata	TN-5
22.8838	386.32	1.92002	8.84008	380.406	NA	13.1238	399.949	2.35873	Canopy former	Myriophyllum spicatum	TN-3
24.3109	412.34	2.52829	24.3159	371.43	5.48145	NA	NA	NA	Canopy former	Ceratophyllum demersum	TN-5
26.1648	411.426	3.29453	15.0531	379.952	2.3754	13.185	382.685	4.67982	Canopy former	Potamogeton wrightii	TN-3
26.7353	402.719	3.68199	19.1022	397.154	3.31319	14.4531	383.073	5.38422	Canopy former	Potamogeton wrightii	TN-3
28.0285	NA	3.65531	17.5012	342.344	4.72738	22.9604	364.316	5.53991	Rosette	Vallisneria natans	TN-3
28.0432	398.567	3.74267	13.8661	400.802	2.68264	11.1839	406.495	3.47424	Canopy former	Potamogeton wrightii	TN-3
28.1974	345.074	4.6907	19.0083	355.235	5.67769	18.7346	320.728	8.65757	Rosette	Vallisneria natans	TN-3
28.2952	400.352	2.92698	15.3657	416.464	2.02381	13.2817	370.572	NA	Canopy former	Potamogeton wrightii	TN-1
28.3434	345.973	3.91059	17.3619	368.605	3.50444	24.6953	374.032	5.35127	Rosette	Vallisneria natans	TN-3
29.4866	359.239	3.89298	15.4595	387.981	3.30573	11.4965	406.677	3.33948	Canopy former	Potamogeton wrightii	TN-3
29.5	373.51	2.99678	19.933	405.674	3.29829	15.7034	407.545	2.90239	Canopy former	Myriophyllum spicatum	TN-3
29.8179	354.879	4.98308	18.6138	367.623	4.77466	21.4833	359.983	4.95569	Rosette	Vallisneria natans	TN-3
30.1771	412.349	5.0255	16.5733	371.184	3.09676	10.9871	408.336	3.9661	Canopy former	Potamogeton wrightii	TN-3
30.4823	419.741	4.12441	16.9594	404.388	2.98005	11.8357	392.935	4.17862	Canopy former	Potamogeton wrightii	TN-2
31.7382	348.219	6.54773	28.485	328.143	NA	24.8285	301.417	14.1054	Rosette	Vallisneria natans	TN-3
31.9766	391.582	4.79495	25.791	369.013	7.12013	17.9638	372.034	7.09502	Rosette	Vallisneria natans	TN-5
32.0434	351.499	2.647	16.1105	406.91	1.30726	13.0644	410.848	2.35845	Canopy former	Myriophyllum spicatum	TN-3
32.1089	360.578	5.88134	24.0199	338.708	8.08508	24.4821	304.674	9.79482	Rosette	Vallisneria natans	TN-4
32.3064	381.124	2.90308	21.4168	374.021	2.06645	18.7446	378.478	1.73153	Rosette	Vallisneria natans	TN-3
32.5227	362.459	6.39373	30.9795	375.884	7.89829	25.0645	308.909	NA	Rosette	Vallisneria natans	TN-3
33.2764	408.673	5.62296	19.18	383.427	3.40637	NA	NA	NA	Canopy former	Ceratophyllum demersum	TN-3
33.4687	399.09	5.52549	20.9142	373.592	3.59955	NA	NA	NA	Canopy former	Ceratophyllum demersum	TN-3
33.6097	369.422	6.7614	28.7676	311.882	10.5901	25.659	319	15.0551	Rosette	Vallisneria natans	TN-5
35.5689	381.033	4.1351	19.1545	362.237	3.75923	16.1767	340.371	3.17182	Rosette	Vallisneria natans	TN-4
36.0436	421.785	2.84139	21.936	410.236	1.9368	NA	NA	NA	Canopy former	Ceratophyllum demersum	TN-5
36.6927	424.449	3.78708	13.858	390.594	1.88233	10.1728	411.169	2.63178	Canopy former	Myriophyllum spicatum	TN-3
36.7228	397.768	6.84293	19.0204	366.025	3.22489	NA	NA	NA	Canopy former	Ceratophyllum demersum	TN-3
36.8986	407.711	2.77396	19.5413	398.633	1.5499	21.2333	400.343	1.97901	Canopy former	Myriophyllum spicatum	TN-3
38.7801	378.063	7.83754	29.818	362.873	6.52697	26.7055	366.648	7.11001	Rosette	Vallisneria natans	TN-5
39.5853	416.952	5.59717	19.8486	373.81	4.07923	NA	NA	NA	Canopy former	Ceratophyllum demersum	TN-5
40.1922	400.049	6.89273	23.7962	341.606	4.90901	22.0347	329.036	3.232	Erect	Hydrilla verticillata	TN-5
40.818	403.547	8.08844	25.8791	375.714	5.90016	NA	NA	NA	Canopy former	Ceratophyllum demersum	TN-3
41.4598	424.585	5.28471	24.8248	392.754	3.01335	NA	NA	NA	Canopy former	Ceratophyllum demersum	TN-3
41.625	414.135	5.80748	29.6148	379.032	3.39943	NA	NA	NA	Canopy former	Ceratophyllum demersum	TN-4
41.6662	418.309	5.64399	25.8466	392.184	2.96827	NA	NA	NA	Canopy former	Ceratophyllum demersum	TN-4
42.0668	399.986	7.67189	33.2397	375.898	6.61294	NA	NA	NA	Canopy former	Ceratophyllum demersum	TN-5
42.2807	427.188	11.486	24.0859	372.123	9.68695	NA	NA	NA	Canopy former	Ceratophyllum demersum	TN-3
42.9854	409.638	4.84914	24.3472	342.208	4.82138	21.0594	341.489	2.81126	Erect	Hydrilla verticillata	TN-4
43.7287	412.75	9.98395	28.4517	385.731	6.33585	NA	NA	NA	Canopy former	Ceratophyllum demersum	TN-5
44.0292	391.965	8.75123	21.1366	320.575	5.84457	26.4571	353.837	7.94555	Erect	Hydrilla verticillata	TN-3
45.2644	419.366	9.08334	28.4111	379.262	6.0907	NA	NA	NA	Canopy former	Ceratophyllum demersum	TN-4
45.309	414.063	6.31609	29.3341	385.694	4.00827	NA	NA	NA	Canopy former	Ceratophyllum demersum	TN-3
45.8479	414.168	10.1642	29.8755	379.542	9.19751	NA	NA	NA	Canopy former	Ceratophyllum demersum	TN-5
45.9367	412.621	7.51099	23.6983	328.991	5.76512	NA	NA	NA	Erect	Hydrilla verticillata	TN-4
46.5206	433.12	5.63559	28.4343	400.114	3.52949	NA	NA	NA	Canopy former	Ceratophyllum demersum	TN-4
47.7197	391.173	12.0973	31.5475	362.557	9.15014	NA	NA	NA	Canopy former	Ceratophyllum demersum	TN-5
52.7322	476.099	4.38316	25.4982	426.452	3.01493	12.6444	459.929	1.21319	Canopy former	Myriophyllum spicatum	TN-4
25.4473	331.879	3.6582	16.3527	318.305	4.83732	16.9611	265.748	NA	Rosette	Vallisneria natans	TN-3
26.0988	316.299	3.49747	17.6584	315.536	5.30414	20.1287	325.52	5.62879	Rosette	Vallisneria natans	TN-3
28.9701	357.61	4.79124	23.1078	356.212	4.19049	27.8735	355.947	5.81323	Rosette	Vallisneria natans	TN-2
29.0197	349.637	1.59179	19.2784	359.071	1.68949	17.28	346.92	1.46505	Rosette	Vallisneria natans	TN-3
29.1194	344.177	4.50135	19.8746	370.461	5.69197	22.1554	389.015	3.99062	Rosette	Vallisneria natans	TN-3
29.7936	361.655	4.45933	17.243	359.94	4.68265	19.8015	339.769	7.89982	Rosette	Vallisneria natans	TN-3
30.8282	335.083	7.35092	19.7798	322.095	NA	17.9041	192.069	17.6945	Rosette	Vallisneria natans	TN-3
31.066	361.545	4.12098	20.023	365.181	4.09547	24.5893	358.543	5.73581	Rosette	Vallisneria natans	TN-3
31.1809	413.898	5.47387	16.5122	412.749	4.31733	12.0607	401.508	5.03872	Canopy former	Potamogeton wrightii	TN-3
31.3252	408.656	4.20501	13.7172	406.663	2.90624	7.41281	398.807	3.05962	Canopy former	Potamogeton wrightii	TN-3
31.6244	364.836	3.63313	17.249	390.953	2.66479	9.37362	413.578	3.28202	Canopy former	Potamogeton wrightii	TN-4
31.659	408.943	6.0013	20.8769	363.461	4.45909	NA	NA	NA	Canopy former	Ceratophyllum demersum	TN-3
32.2559	431.629	3.44814	13.3237	415.163	NA	NA	NA	NA	Canopy former	Potamogeton wrightii	TN-4
33.1749	435.974	3.70779	14.2235	413.415	2.52678	11.8551	401.035	3.13024	Canopy former	Potamogeton wrightii	TN-4
33.2943	369.993	3.57216	19.5429	368.097	3.4658	17.54	376.217	2.91496	Rosette	Vallisneria natans	TN-4
33.3611	400.578	3.85653	19.4629	409.23	2.68435	14.6588	398.908	3.33312	Canopy former	Potamogeton wrightii	TN-4
33.9126	375.165	7.87961	29.4244	361.526	8.33333	18.4037	356.17	3.25358	Erect	Hydrilla verticillata	TN-3
34.453	368.233	4.24416	25.1092	334.314	4.41952	23.2665	304.251	4.88981	Rosette	Vallisneria natans	TN-4
34.5046	428.59	4.03336	18.0761	410.628	3.4481	12.1975	384.692	4.38348	Canopy former	Potamogeton wrightii	TN-3
35.1413	391.9	4.94386	17.7978	379.749	3.77445	12.6598	387.955	4.42749	Canopy former	Potamogeton wrightii	TN-3
35.2003	409.561	7.08983	18.9594	371.925	4.30073	NA	NA	NA	Canopy former	Ceratophyllum demersum	TN-3
35.3032	367.386	4.93581	19.5929	339.157	4.88759	25.1706	347.828	5.73849	Rosette	Vallisneria natans	TN-3
35.781	354.86	4.05348	17.4522	344.003	3.70137	19.6964	307.364	5.6425	Rosette	Vallisneria natans	TN-4
36.0067	381.55	4.24921	21.7409	405.752	3.60187	18.0664	386.893	4.84414	Canopy former	Myriophyllum spicatum	TN-5
36.0771	393.516	5.85783	20.9635	379.861	2.94386	NA	NA	NA	Canopy former	Ceratophyllum demersum	TN-3
36.2955	439.094	4.17642	22.8983	410.89	3.27553	18.912	391.369	4.13043	Canopy former	Potamogeton wrightii	TN-5
36.6939	379.754	5.97843	21.7678	332.855	5.52202	26.0358	357.538	5.73152	Erect	Hydrilla verticillata	TN-2
37.4681	406.02	6.23863	22.7263	375.003	3.54405	NA	NA	NA	Canopy former	Ceratophyllum demersum	TN-3
37.8878	433.3	4.90923	22.0797	391.375	3.68194	17.74	374.816	5.69828	Canopy former	Potamogeton wrightii	TN-3
38.7814	389.019	6.52738	21.2733	375.062	2.87073	NA	NA	NA	Canopy former	Ceratophyllum demersum	TN-3
40.581	411.405	3.4381	25.5074	397.186	1.99487	NA	NA	NA	Canopy former	Myriophyllum spicatum	TN-4
42.3465	410.629	4.49447	22.6145	395.161	4.0834	20.0057	367.448	6.00153	Canopy former	Myriophyllum spicatum	TN-2
42.3881	415.595	7.15518	29.3802	392.232	5.17575	NA	NA	NA	Canopy former	Ceratophyllum demersum	TN-5
44.6762	388.819	7.0798	28.0512	339.559	7.7857	NA	NA	NA	Erect	Hydrilla verticillata	TN-3
45.5556	397.631	9.3188	32.2306	389.362	5.28398	NA	NA	NA	Canopy former	Ceratophyllum demersum	TN-5
47.104	405.975	7.31384	31.836	371.098	8.01787	24.2924	NA	12.2347	Erect	Potamogeton crispus	TN-5
48.5704	418.806	6.86172	21.8223	330.661	5.04853	NA	NA	NA	Erect	Hydrilla verticillata	TN-3
